# Supplementary material for: SARNAclust: Semi-automatic detection of RNA protein binding motifs from immunoprecipitation data
Source: PLoS Comput Biol. 2018 Mar 29;14(3):e1006078. doi: 10.1371/journal.pcbi.1006078 (PMC5892938; doi:10.1371/journal.pcbi.1006078)
Supplement: S2 Data — (XLSX) [file pcbi.1006078.s012.xlsx]

## Sheet: ARI
Threshold	option 0	option 1	option 2	option 3	option 4	option 5	option 6	option 7	option 8	option 9	option 10	option 11
0.05	0	0	0	0.550743	0.221088	0.438792	0.962986	0.0994708	0.221088	0.221088	0	0.221088
0.1	0	0	0	0.550743	0.221088	0.438792	0.962986	0.175773	0.221088	0.221088	0	0.242323
0.15	0	0	0	0.550743	0.432802	0.438792	0.962986	0.241665	0.221088	0.221088	0	0.618509
0.2	0	0	0	0.550743	0.432802	0.438792	0.962986	0.371599	0.221088	0.221088	0.0366542	0.696841
0.25	0.069158	0.103717	0.103717	0.550743	0.432802	0.450007	0.962986	0.441681	0.221088	0.221088	0.0951665	0.725973
0.3	0.281404	0.223544	0.223544	0.550743	0.432802	0.451151	0.934996	0.547549	0.432802	0.432802	0.201062	0.818072
0.35	0.36703	0.327133	0.327133	0.550743	0.420076	0.522356	0.934996	0.575122	0.441847	0.654558	0.489157	0.812754
0.4	0.534479	0.360687	0.362799	0.550743	0.491927	0.562955	0.857219	0.601934	0.421947	0.74831	0.726268	0.841397
0.45	0.624521	0.452064	0.473793	0.550743	0.491927	0.568928	0.853942	0.615128	0.483757	0.799142	0.917961	0.945329
0.5	0.467047	0.639915	0.644055	0.550743	0.608141	0.568928	0.850679	0.640777	0.609728	0.788152	0.970628	0.968844
0.55	-0.0333137	0.748458	0.752619	0.550756	0.378822	0.489127	0.547197	0.488405	0.405599	0.693001	0.88484	0.949722
0.6	-0.00299083	0.491355	0.502749	0.548802	0.4634	0.487121	0.47967	0.463741	0.495134	0.547131	0.594068	0.490331
0.65	0	0.632403	0.633719	0.529112	0.483575	0.548453	0.523555	0.508022	0.533289	0.552696	0.62115	0.579244
0.7	0	0.623718	0.621766	0.529112	0.487964	0.529962	0.49247	0.471752	0.490554	0.510599	0.582775	0.555633
0.75	0	0.344799	0.331361	0.491179	0.438243	0.498939	0.49247	0.471752	0.349806	0.408317	0.508816	0.348041
0.8	0	0	0	0.417865	0.437246	0.417865	0.417865	0.339086	0.339532	0.339532	0.508283	0.224858
0.85	0	0	0	0.417865	0.224858	0.417865	0.417865	0.224526	0.224858	0.224858	0.224526	0
0.9	0	0	0	0.224526	0.224526	0.224526	0.224526	0	0.224526	0.224526	0	0
0.95	0	0	0	0.224526	0.224526	0.224526	0.224526	0	0.224526	0.224526	0	0
1	0	0	0	0	0	0	0	0	0	0	0	0

## Sheet: AMI
Threshold	option 0	option 1	option 2	option 3	option 4	option 5	option 6	option 7	option 8	option 9	option 10	option 11
0.05	-7.88739e-16	-7.88739e-16	-7.88739e-16	0.600658	0.207648	0.584687	0.899534	0.13904	0.207648	0.207648	-7.88739e-16	0.207648
0.1	-7.88739e-16	-7.88739e-16	-7.88739e-16	0.600658	0.207648	0.584687	0.899534	0.202865	0.207648	0.207648	-7.88739e-16	0.223257
0.15	-7.88739e-16	-7.88739e-16	-7.88739e-16	0.600658	0.41183	0.584687	0.899534	0.265863	0.207648	0.207648	-7.88739e-16	0.586013
0.2	-7.88739e-16	-7.88739e-16	-7.88739e-16	0.600658	0.41183	0.584687	0.899534	0.415191	0.207648	0.207648	0.027005	0.664122
0.25	0.0511255	0.0796959	0.0796959	0.600658	0.41183	0.578953	0.899534	0.482887	0.207648	0.207648	0.0730427	0.69206
0.3	0.225036	0.177989	0.177989	0.600658	0.41183	0.578788	0.899366	0.518917	0.41183	0.41183	0.157389	0.800835
0.35	0.281904	0.265994	0.265994	0.600658	0.412402	0.585818	0.899366	0.535376	0.429388	0.629029	0.39809	0.795572
0.4	0.253926	0.296304	0.298301	0.600658	0.621349	0.633233	0.81867	0.548802	0.530976	0.713197	0.639914	0.820794
0.45	0.316496	0.374968	0.394069	0.600658	0.621349	0.642242	0.815602	0.551713	0.606148	0.773393	0.868571	0.925955
0.5	0.298506	0.559764	0.564201	0.600658	0.625195	0.642242	0.81262	0.539258	0.628448	0.771689	0.94606	0.948045
0.55	0.165967	0.689956	0.695162	0.600966	0.45229	0.561949	0.534981	0.534772	0.493917	0.752418	0.829347	0.92479
0.6	-0.00039423	0.560078	0.56595	0.595374	0.461117	0.583785	0.513839	0.545601	0.501882	0.600339	0.721682	0.553322
0.65	-7.88739e-16	0.737146	0.740546	0.569178	0.510154	0.615076	0.544384	0.564727	0.550893	0.653845	0.706423	0.614912
0.7	-7.88739e-16	0.71252	0.707118	0.569178	0.530126	0.601031	0.568343	0.555102	0.531454	0.573757	0.617886	0.588442
0.75	-7.88739e-16	0.395854	0.38134	0.546921	0.582435	0.639171	0.568343	0.555102	0.435899	0.496309	0.559816	0.435409
0.8	-7.88739e-16	-7.88739e-16	-7.88739e-16	0.489373	0.574945	0.489373	0.489373	0.424389	0.414856	0.414856	0.564009	0.255785
0.85	-7.88739e-16	-7.88739e-16	-7.88739e-16	0.489373	0.255785	0.489373	0.489373	0.255691	0.255785	0.255785	0.255691	-7.88739e-16
0.9	-7.88739e-16	-7.88739e-16	-7.88739e-16	0.255691	0.255691	0.255691	0.255691	-7.88739e-16	0.255691	0.255691	-7.88739e-16	-7.88739e-16
0.95	-7.88739e-16	-7.88739e-16	-7.88739e-16	0.255691	0.255691	0.255691	0.255691	-7.88739e-16	0.255691	0.255691	-7.88739e-16	-7.88739e-16
1	-7.88739e-16	-7.88739e-16	-7.88739e-16	-7.88739e-16	-7.88739e-16	-7.88739e-16	-7.88739e-16	-7.88739e-16	-7.88739e-16	-7.88739e-16	-7.88739e-16	-7.88739e-16

## Sheet: HS
Threshold	option 0	option 1	option 2	option 3	option 4	option 5	option 6	option 7	option 8	option 9	option 10	option 11
0.05	-2.83946e-16	-2.83946e-16	-2.83946e-16	0.828029	0.208808	0.633825	0.900119	0.151661	0.208808	0.208808	-2.83946e-16	0.208808
0.1	-2.83946e-16	-2.83946e-16	-2.83946e-16	0.828029	0.208808	0.633825	0.900119	0.215804	0.208808	0.208808	-2.83946e-16	0.225639
0.15	-2.83946e-16	-2.83946e-16	-2.83946e-16	0.828029	0.413552	0.633825	0.900119	0.277717	0.208808	0.208808	-2.83946e-16	0.587833
0.2	-2.83946e-16	-2.83946e-16	-2.83946e-16	0.828029	0.413552	0.633825	0.900119	0.42939	0.208808	0.208808	0.0286239	0.66723
0.25	0.0541894	0.0851965	0.0851965	0.828029	0.413552	0.646181	0.900119	0.52237	0.208808	0.208808	0.0776268	0.69494
0.3	0.231277	0.181824	0.181824	0.828029	0.413552	0.647447	0.900119	0.631447	0.413552	0.413552	0.165736	0.802001
0.35	0.286375	0.270614	0.270614	0.828029	0.41505	0.73421	0.900119	0.663149	0.432885	0.63126	0.408887	0.796769
0.4	0.256038	0.300694	0.302676	0.828029	0.625474	0.793944	0.883912	0.7231	0.536793	0.715309	0.644461	0.822141
0.45	0.317474	0.378794	0.397748	0.828029	0.625474	0.808091	0.883912	0.739036	0.61044	0.77472	0.869537	0.926607
0.5	0.299508	0.562373	0.566782	0.828029	0.773189	0.808091	0.883912	0.78021	0.776315	0.773024	0.946455	0.96785
0.55	0.172395	0.691778	0.696953	0.828029	0.68433	0.808091	0.824809	0.788039	0.784934	0.773831	0.979085	0.955607
0.6	0.000692188	0.908397	0.917282	0.807646	0.798562	0.808091	0.824809	0.762967	0.936226	0.851132	0.98484	0.955607
0.65	-2.83946e-16	0.985006	0.991217	0.724686	0.701094	0.793397	0.729474	0.682111	0.828801	0.750598	0.952961	0.915361
0.7	-2.83946e-16	0.959714	0.953592	0.724686	0.697379	0.721597	0.640124	0.596191	0.702127	0.717484	0.892453	0.8404
0.75	-2.83946e-16	0.399426	0.38496	0.625089	0.58555	0.640735	0.640124	0.596191	0.440214	0.525913	0.688794	0.437939
0.8	-2.83946e-16	-2.83946e-16	-2.83946e-16	0.490838	0.577184	0.490838	0.490838	0.426054	0.417082	0.417082	0.683289	0.257345
0.85	-2.83946e-16	-2.83946e-16	-2.83946e-16	0.490838	0.257345	0.490838	0.490838	0.256754	0.257345	0.257345	0.256754	-2.83946e-16
0.9	-2.83946e-16	-2.83946e-16	-2.83946e-16	0.256754	0.256754	0.256754	0.256754	-2.83946e-16	0.256754	0.256754	-2.83946e-16	-2.83946e-16
0.95	-2.83946e-16	-2.83946e-16	-2.83946e-16	0.256754	0.256754	0.256754	0.256754	-2.83946e-16	0.256754	0.256754	-2.83946e-16	-2.83946e-16
1	-2.83946e-16	-2.83946e-16	-2.83946e-16	-2.83946e-16	-2.83946e-16	-2.83946e-16	-2.83946e-16	-2.83946e-16	-2.83946e-16	-2.83946e-16	-2.83946e-16	-2.83946e-16

## Sheet: CS
Threshold	option 0	option 1	option 2	option 3	option 4	option 5	option 6	option 7	option 8	option 9	option 10	option 11
0.05	1	1	1	0.604033	1	0.586918	0.968593	0.331244	1	1	1	1
0.1	1	1	1	0.604033	1	0.586918	0.968593	0.385195	1	1	1	0.919725
0.15	1	1	1	0.604033	1	0.586918	0.968593	0.449665	1	1	1	0.97337
0.2	1	1	1	0.604033	1	0.586918	0.968593	0.480941	1	1	0.516534	0.911426
0.25	0.521123	0.535609	0.535609	0.604033	1	0.58175	0.968593	0.496731	1	1	0.534598	0.901205
0.3	0.624288	0.655896	0.655896	0.604033	1	0.581589	0.922398	0.530932	1	1	0.544142	0.985734
0.35	0.649594	0.668373	0.668373	0.604033	0.928776	0.58929	0.922398	0.546758	0.891504	0.968021	0.582351	0.974504
0.4	0.57651	0.690786	0.692273	0.604033	0.699876	0.635366	0.820202	0.559449	0.628246	0.925454	0.740996	0.945231
0.45	0.617221	0.71977	0.725598	0.604033	0.699876	0.644314	0.817152	0.562131	0.687274	0.949224	0.919699	0.935225
0.5	0.519421	0.821639	0.824311	0.604033	0.630489	0.644314	0.814188	0.546296	0.633701	0.924555	0.963113	0.948417
0.55	0.254295	0.90798	0.911307	0.604309	0.461652	0.566639	0.541683	0.5407	0.502606	0.755767	0.831568	0.925322
0.6	0.0562778	0.565877	0.571298	0.598334	0.47137	0.586433	0.519562	0.549024	0.511497	0.60626	0.723471	0.558913
0.65	1	0.738873	0.742247	0.572031	0.516437	0.617689	0.54857	0.567424	0.556581	0.655598	0.708332	0.618879
0.7	1	0.714392	0.709023	0.572031	0.535184	0.603425	0.571794	0.557595	0.536475	0.577357	0.621489	0.591936
0.75	1	0.458844	0.448552	0.549246	0.594389	0.642683	0.571794	0.557595	0.498392	0.499891	0.563065	0.519012
0.8	1	1	1	0.579452	0.617958	0.579452	0.579452	0.560756	0.538924	0.538924	0.566945	0.432633
0.85	1	1	1	0.579452	0.432633	0.579452	0.579452	0.434818	0.432633	0.432633	0.434818	1
0.9	1	1	1	0.434818	0.434818	0.434818	0.434818	1	0.434818	0.434818	1	1
0.95	1	1	1	0.434818	0.434818	0.434818	0.434818	1	0.434818	0.434818	1	1
1	1	1	1	1	1	1	1	1	1	1	1	1

## Sheet: VMS
Threshold	option 0	option 1	option 2	option 3	option 4	option 5	option 6	option 7	option 8	option 9	option 10	option 11
0.05	-5.67892e-16	-5.67892e-16	-5.67892e-16	0.698513	0.345477	0.60947	0.933102	0.20806	0.345477	0.345477	-5.67892e-16	0.345477
0.1	-5.67892e-16	-5.67892e-16	-5.67892e-16	0.698513	0.345477	0.60947	0.933102	0.276628	0.345477	0.345477	-5.67892e-16	0.362376
0.15	-5.67892e-16	-5.67892e-16	-5.67892e-16	0.698513	0.585125	0.60947	0.933102	0.343368	0.345477	0.345477	-5.67892e-16	0.732998
0.2	-5.67892e-16	-5.67892e-16	-5.67892e-16	0.698513	0.585125	0.60947	0.933102	0.453706	0.345477	0.345477	0.054242	0.770441
0.25	0.0981705	0.147009	0.147009	0.698513	0.585125	0.612275	0.933102	0.509228	0.345477	0.345477	0.135568	0.784745
0.3	0.337517	0.28472	0.28472	0.698513	0.585125	0.612753	0.911123	0.576844	0.585125	0.585125	0.254083	0.884426
0.35	0.397508	0.385247	0.385247	0.698513	0.573718	0.653816	0.911123	0.599355	0.582788	0.764185	0.480441	0.876719
0.4	0.354594	0.419	0.421196	0.698513	0.660586	0.705858	0.850866	0.630834	0.57893	0.806924	0.689365	0.879399
0.45	0.419284	0.496365	0.513831	0.698513	0.660586	0.716969	0.849222	0.638558	0.646582	0.85314	0.893915	0.930896
0.5	0.379937	0.667722	0.671709	0.698513	0.694585	0.716969	0.847618	0.642629	0.697796	0.842026	0.954712	0.958035
0.55	0.205485	0.78527	0.789845	0.698697	0.551357	0.666161	0.653915	0.641349	0.612816	0.764692	0.899317	0.940221
0.6	0.00136756	0.697348	0.704082	0.68741	0.592816	0.679646	0.637531	0.638552	0.661559	0.708124	0.834161	0.705308
0.65	-5.67892e-16	0.844368	0.848853	0.639373	0.594763	0.694604	0.626219	0.619504	0.665946	0.699889	0.812635	0.738474
0.7	-5.67892e-16	0.819079	0.81332	0.639373	0.60561	0.657242	0.604033	0.576248	0.608224	0.639838	0.732722	0.694618
0.75	-5.67892e-16	0.427078	0.41433	0.584718	0.589936	0.641707	0.604033	0.576248	0.4675	0.512572	0.619616	0.475042
0.8	-5.67892e-16	-5.67892e-16	-5.67892e-16	0.531477	0.596876	0.531477	0.531477	0.484212	0.470239	0.470239	0.619704	0.322723
0.85	-5.67892e-16	-5.67892e-16	-5.67892e-16	0.531477	0.322723	0.531477	0.531477	0.322862	0.322723	0.322723	0.322862	-5.67892e-16
0.9	-5.67892e-16	-5.67892e-16	-5.67892e-16	0.322862	0.322862	0.322862	0.322862	-5.67892e-16	0.322862	0.322862	-5.67892e-16	-5.67892e-16
0.95	-5.67892e-16	-5.67892e-16	-5.67892e-16	0.322862	0.322862	0.322862	0.322862	-5.67892e-16	0.322862	0.322862	-5.67892e-16	-5.67892e-16
1	-5.67892e-16	-5.67892e-16	-5.67892e-16	-5.67892e-16	-5.67892e-16	-5.67892e-16	-5.67892e-16	-5.67892e-16	-5.67892e-16	-5.67892e-16	-5.67892e-16	-5.67892e-16

## Sheet: FMS
Threshold	option 0	option 1	option 2	option 3	option 4	option 5	option 6	option 7	option 8	option 9	option 10	option 11
0.05	0.68287	0.68287	0.68287	0.731255	0.729821	0.674322	0.980297	0.657158	0.729821	0.729821	0.68287	0.729821
0.1	0.68287	0.68287	0.68287	0.731255	0.729821	0.674322	0.980297	0.673317	0.729821	0.729821	0.68287	0.734179
0.15	0.68287	0.68287	0.68287	0.731255	0.783388	0.674322	0.980297	0.689977	0.729821	0.729821	0.68287	0.839498
0.2	0.68287	0.68287	0.68287	0.731255	0.783388	0.674322	0.980297	0.71332	0.729821	0.729821	0.689172	0.865552
0.25	0.694978	0.701795	0.701795	0.731255	0.783388	0.67924	0.980297	0.728339	0.729821	0.729821	0.700095	0.876159
0.3	0.73959	0.726889	0.726889	0.731255	0.783388	0.679755	0.965008	0.765849	0.783388	0.783388	0.721189	0.913373
0.35	0.760887	0.750838	0.750838	0.731255	0.774464	0.716102	0.965008	0.777272	0.780016	0.851587	0.791605	0.910344
0.4	0.805462	0.759508	0.760065	0.731255	0.749973	0.740461	0.921541	0.784074	0.72455	0.884634	0.87337	0.922312
0.45	0.825063	0.783912	0.790069	0.731255	0.749973	0.744174	0.919673	0.789698	0.746874	0.903716	0.958083	0.971253
0.5	0.729173	0.843711	0.84519	0.731255	0.783605	0.744174	0.91781	0.793535	0.784618	0.896238	0.984539	0.983266
0.55	0.470174	0.88487	0.886541	0.731264	0.623992	0.688334	0.728647	0.688618	0.63944	0.838387	0.937006	0.972886
0.6	0.680334	0.689885	0.697713	0.730008	0.669047	0.686882	0.68067	0.671167	0.691697	0.728477	0.760396	0.688312
0.65	0.68287	0.785513	0.786402	0.717689	0.689591	0.73027	0.713867	0.705409	0.719461	0.734998	0.778145	0.750248
0.7	0.68287	0.779837	0.778551	0.717689	0.692777	0.719164	0.699311	0.686749	0.694236	0.707333	0.752605	0.734302
0.75	0.68287	0.629115	0.623287	0.695994	0.676099	0.707219	0.699311	0.686749	0.635549	0.653624	0.705746	0.636365
0.8	0.68287	0.68287	0.68287	0.669183	0.677869	0.669183	0.669183	0.638674	0.637533	0.637533	0.705571	0.599087
0.85	0.68287	0.68287	0.68287	0.669183	0.599087	0.669183	0.669183	0.599177	0.599087	0.599087	0.599177	0.68287
0.9	0.68287	0.68287	0.68287	0.599177	0.599177	0.599177	0.599177	0.68287	0.599177	0.599177	0.68287	0.68287
0.95	0.68287	0.68287	0.68287	0.599177	0.599177	0.599177	0.599177	0.68287	0.599177	0.599177	0.68287	0.68287
1	0.68287	0.68287	0.68287	0.68287	0.68287	0.68287	0.68287	0.68287	0.68287	0.68287	0.68287	0.68287
